# Supplementary material
Source: Research Square preprint supplement (doi:10.21203/rs.3.rs-10176348/v1)
Supplement: Supplementary file 1 [file 2663211515f23d056165a3c9.xlsx]

## Sheet: Planilha1
	Parkinson`s disease (n = 95)			Control group (n = 95)
Body composition	DXA (mean ±SD)	BIA (mean ±SD)	p-value	DXA (mean ±SD)	BIA (mean ±SD)	p-value
Fat mass (Kg)	22.01 ± 8.95	21.88 ± 9.84	0.599	24.08 ± 7.66	24.33 ± 8.58	0.158
Fat mass (%)	32.22 ± 9.81	32.11 ± 10.87	0.431	35.07 ± 8.52	35.50 ± 9.63	0.074
Lean mass (Kg)	43.01 ± 9.07	41.84 ± 9.02	<0.001	42.70 ± 11.06	41.46 ± 10.55	<0.001
Appendicular lean mass (Kg)	18.73 ± 4.63	17.51 ± 4.61	<0.001	18.75 ± 5.37	17.46 ± 5.5	<0.001
Appendicular lean mass index (Kg/m2)	7.37 ± 1.18	6.89 ± 1.12	<0.001	7.39 ± 1.35	6.83 ± 1.36	<0.001
Body composition parameters assessed by DXA and BIA in participants with and without Parkinson’s disease Values are presented as mean ± standard deviation (median) DXA: dual-energy X-ray absorptiometry; BIA: bioelectrical impedance analysis; SD: standard deviation p: paired comparison between DXA and BIA within each group (Wilcoxon signed-rank test).
