# Supplementary material
Source: Research Square preprint supplement (doi:10.21203/rs.3.rs-10176348/v1)
Supplement: Supplementary file 2 [file a05b46aa99e4fa57427965f6.xlsx]

## Sheet: Planilha1
	Parkinson`s disease (n = 95)		Control group (n = 95)
Variable	Spearman’s rho (ρ)	ICC (95% CI)	Spearman’s rho (ρ)	ICC (95% CI)
Fat mass	0.977	0.974 (0.964-0.981)	0.958	0.952 (0.933-0.966)
Fat mass (%)	0.957	0.952 (0.933-0.966)	0.938	0.931 (0.904-0.950)
Lean mass	0.974	0.977 (0.968-0.984)	0.965	0.964 (0.950-0.974)
Appendicular lean mass	0.963	0.966 (0.953-0.976)	0.967	0.966 (0.953-0.976)
Appendicular lean mass index	0.901	0.914 (0.881-0.938)	0.91	0.909 (0.875-0.935)
Correlation and consistency between body composition parameters obtained by BIA and DXA in participants with and without Parkinson’s disease ρ: Spearman’s rank correlation coefficient; all correlations were statistically significant (p < 0.001). ICC: intra-class correlation coefficient (two-way fixed, consistency model); 95% CI: 95% confidence interval; DXA: dual-energy X-ray absorptiometry; BIA:…
