# Supplementary material
Source: Research Square preprint supplement (doi:10.21203/rs.3.rs-10176348/v1)
Supplement: Supplementary file 3 [file ac67f1a900d553c808ebf7e3.xlsx]

## Sheet: Planilha1
Variable	Parkinson’s disease (n = 95)	Controls (n = 95)	p-value	p-value*
Sociodemographic data
Age (years)	64.94 ± 10.66 (65)	69.32 ± 11.43 (70)	0.003	--
Male sex, n (%)	54 (56.8)	56 (58.9)	0.769	--
Anthropometric data
Height (cm)	158.18 ± 9.32 (158)	157.71 ± 11.21 (158)	0.637	0.444
Weight (kg)	66.56 ± 14.22 (65.4)	68.39 ± 14.48 (67.9)	0.312	0.08
BMI (kg/m2)	26.49 ± 4.13 (26.7)	27.36 ± 4.39 (27.3)	0.163	0.093
Waist-to-hip ratio	0.901 ± 0.08 (0.9)	0.953 ± 0.09 (0.96)	<0.001	<0.001
Functional assessment
Handgrip strength (kgf)	28.92 ± 10.62 (28)	27.23 ± 11.40 (24)	0.243	0.848
Gait speed (m/s)	1.340 ± 0.484 (1.38)	0.992 ± 0.278 (0.98)	<0.001	<0.001
Balance SPPB score	3.19 ± 1.24 (4)	3.46 ± 0.95 (4)	0.195	0.012
5-times sit-to-stand SPPB score	2.1 ± 1.4 (1)	2.3 ± 1.0 (2)	0.047	0.172
SPPB total score	8.94 ± 2.62 (9)	8.74 ± 1.94 (9)	0.359	0.673
Falls, last 6 months (n)a	0.826 ± 1.38 (0)	0.484 ± 1.41 (0)	0.022	0.046
Comorbidities
Hypertension, n (%)	46 (48.4)	69 (72.6)	<0.001	0.006
Type 2 diabetes mellitus, n (%)	11 (11.6)	33 (34.7)	<0.001	<0.001
Dyslipidemia, n (%)	15 (15.8)	50 (52.6)	<0.001	<0.001
Atherosclerotic disease, n (%)	9 (9.5)	13 (13.7)	0.364	0.599
Sarcopenia, n (%) b	12 (12.6)	18 (18.9)	0.233	0.581
Osteopenia/osteoporosis, n (%)	69 (72.6)	63 (66.3)	0.414	0.443
Depression, n (%)	15 (15.8)	17 (17.9)	0.698	0.986
Anxiety, n (%)	8 (8.4)	9 (9.5)	0.799	0.795
Lifestyle factors
Protein intake (g/kg/day)	1.20 ± 0.40 (1.17)	1.06 ± 0.40 (0.95)	0.004	0.1
Regular physical activity, n (%)c	42 (44.3)	25 (26.3)	0.012	0.027
Smoking (current or past), n (%)	30 (31.6)	48 (50.5)	0.008	0.039
Alcohol use (current), n (%)	11 (11.6)	10 (10.5)	0.817	0.995
Sociodemographic, clinical, and functional characteristics of participants with Parkinson’s disease and controls Continuous variables are presented as mean ± standard deviation (median); categorical variables as absolute numbers and percentages. p⁎: values adjusted for age. a: Three participants from the Parkinson’s disease group were excluded from the falls analysis due to memory recall bias tha…
