# Supplementary material
Source: Research Square preprint supplement (doi:10.21203/rs.3.rs-10176348/v1)
Supplement: Supplementary file 4 [file e3d0d16399c0951862d4e62b.xlsx]

## Sheet: Planilha1
Variable	N (%) or mean ± SD
Disease duration (years)	11.1 ± 5.7
Levodopa equivalent daily dose (mg/day)	1,152 ± 585
Hoehn & Yahr stage
1	2 (2.1)
2	23 (24.2)
2.5	37 (38.9)
3	33 (34.7)
Schwab & England scale (%)
100	9 (9.5)
90	43 (45.3)
80	25 (26.3)
70	14 (14.7)
60	1 (1.1)
50	1 (1.1)
40	2 (2.1)
Dyskinesia/chorea/dystonia (UPDRS-III)
Yes	42 (44.2)
No	53 (55.8)
Postural stability (UPDRS-III)
0 – Normal	22 (23.2)
1 – Slight instability	40 (42.1)
2 – Moderate instability	8 (8.4)
3 – Severe instability	23 (24.2)
4 – Falls without support	2 (2.1)
Tremor (worst side, UPDRS-III)
0 – None	16 (16.8)
1 – Mild	61 (64.2)
2 – Moderate	13 (13.7)
3 – Severe	5 (5.3)
UPDRS-III motor score	44 ± 15
Clinical characteristics of participants with Parkinson’s disease (n = 95) Values are expressed as absolute numbers and percentages, or as mean ± standard deviation (SD). UPDRS-III: Unified Parkinson’s Disease Rating Scale – part III.
